# Supplementary material for: Impact of age, sex and body mass index on cortisol secretion in 143 healthy adults
Source: PubMed Central journal article supplement — Endocr Connect. 2017 Jul 31;6(7):500–9. doi: 10.1530/EC-17-0160 (PMC5597974; doi:10.1530/ec-17-0160), 2017-07-31
Supplement: ec-6-500-t001.pdf [file ec-6-500-t001.pdf]

**Supplemental Table 1. Linear Regression of Cortisol Secretion Parameters, BMI, IGF-I, FT4 and Approximate Entropy versus Age in Healthy Volunteers**

|                                  | <b>R</b> | <b>P-value</b> | <b>β</b>     |
|----------------------------------|----------|----------------|--------------|
| Pulse frequency (no/24 h)        | 0.032    | 0.72           | -0.010±0.066 |
| Slow half-life (min)             | 0.057    | 0.53           | -0.038±0.061 |
| Mode day (min)                   | 0.076    | 0.40           | -0.048±0.057 |
| Mode night (min)                 | 0.148    | 0.10           | -0.086±0.042 |
| Basal secretion (nmol/L/24h)     | 0.084.   | 0.36           | 3.55±3.83    |
| Pulsatile secretion (nmol/L/24h) | 0.100    | 0.27           | -10.32±9.33  |
| Total secretion (nmol/L/24h)     | 0.057    | 0.53           | -6.77±10.71  |
| Mean pulse mass (nmol/L)         | 0.094    | 0.30           | -0.64±0.61   |
| Weibull lambda (no/24 h)         | 0.004    | 0.97           | 0.001±0.025  |
| Weibull gamma (dimensionless)    | 0.039    | 0.67           | 0.001±0.002  |
| BMI (kg/m <sup>2</sup> )         | 0.051    | 0.57           | 0.020±0.035  |
| IGF-1 (nmol/L)                   | 0.506    | <0.0001        | -0.213±0.033 |
| Free T4 (nmol/L)                 | 0.138    | 0.21           | -0.027±0.022 |
| ApEn (dimensionless)             | 0.177    | 0.05           | 0.002±0.001  |

The slope is expressed as mean ± SD. Logarithmical transformation of basal, pulsatile and total secretion did not change outcome. Separate analyses for men and women were comparable.
